# Supplementary material for: Risk factors predicting need for the pediatric intensive care unit (PICU) post-hematopoietic cell transplant, PICU utilization, and outcomes following HCT: a single center retrospective analysis
Source: PubMed Central journal article supplement (PMC11059064; doi:10.3389/fped.2024.1385153), 2024-04-16
Supplement: Table1.pdf [file Table1.pdf]

|               | Age   | Weight | Race  | Underlying dx | CMV   | Regimen |
|---------------|-------|--------|-------|---------------|-------|---------|
| Age           | --    | --     | --    | --            | --    | --      |
| Weight        | <0.01 | --     | --    | --            | --    | --      |
| Race          | 0.76  | 0.30   | --    | --            | --    | --      |
| Underlying dx | 0.09  | 0.30   | 0.14  | --            | --    | --      |
| CMV           | 0.04  | 0.01   | <0.01 | <0.01         | --    | --      |
| Regimen       | <0.01 | <0.01  | 0.33  | <0.01         | <0.01 | --      |

**Supplementary Table 1. Correlation Table for Multivariate Analysis.**

Dx = diagnosis, CMV = cytomegalovirus, Regimen = Conditioning Regimen

|                               | Odds ratio (PICU) 95% CI | P value |
|-------------------------------|--------------------------|---------|
| Age (1 year older)            | 0.92 (0.87-0.97)         | <0.01   |
| Underlying Disease            |                          | 0.09    |
| Malignant                     | 1.00                     |         |
| Non-malignant                 | 0.55 (0.28-1.08)         |         |
| Inherited Metabolic Disorders | 1.10 (0.53-2.29)         |         |

**Supplementary Table 2. Final Multivariate Analysis Model.**

CI = confidence interval

**Interpretation:** Every one year older was significantly associated ( $p < 0.01$ ) with odds ratio of 0.92 (95% CI 0.87-0.97), less chance of experiencing PICU after adjusted with underlying disease. Underlying disease was associated with marginal association with probability of having PICU ( $p = 0.09$ ).

|                        | All Patients | No ICU    | ICU       | P-value |
|------------------------|--------------|-----------|-----------|---------|
|                        | N=91         | N=76      | N=15      |         |
| <b>DLCO_Z</b>          |              |           |           | 0.69    |
| Normal: $ z  < 1.64$   | 54(59.3%)    | 45(59.2%) | 9(60.0%)  |         |
| Mild: $ z  [1.64, 3)$  | 31(34.1%)    | 25(32.9%) | 6(40.0%)  |         |
| Moderate: $ z  [3, 4)$ | 3(3.3%)      | 3(3.9%)   | 0         |         |
| Missing                | 3(3.3%)      | 3(3.9%)   | 0         |         |
| <b>TLC_Z</b>           |              |           |           | 0.95    |
| Normal: $ z  < 1.64$   | 75(82.4%)    | 62(81.6%) | 13(86.7%) |         |
| Mild: $ z  [1.64, 3)$  | 12(13.2%)    | 10(13.2%) | 2(13.3%)  |         |

|                     |           |           |            |      |
|---------------------|-----------|-----------|------------|------|
| Missing             | 4(4.4%)   | 4(5.3%)   | 0          |      |
| <b>RV_Z</b>         |           |           |            | 0.29 |
| Normal:  z  <1.64   | 82(90.1%) | 67(88.2%) | 15(100.0%) |      |
| Mild:  z  [1.64, 3) | 5(5.5%)   | 5(6.6%)   | 0          |      |
| Missing             | 4(4.4%)   | 4(5.3%)   | 0          |      |
| <b>RVTLC_Z</b>      |           |           |            | 0.93 |
| Normal:  z  <1.64   | 76(83.5%) | 63(82.9%) | 13(86.7%)  |      |
| Mild:  z  [1.64, 3) | 11(12.1%) | 9(11.8%)  | 2(13.3%)   |      |
| Missing             | 4(4.4%)   | 4(5.3%)   | 0          |      |
| <b>FEV1_Z</b>       |           |           |            | 0.25 |
| Normal:  z  <1.64   | 70(76.9%) | 56(73.7%) | 14(93.3%)  |      |
| Mild:  z  [1.64, 3) | 19(20.9%) | 18(23.7%) | 1(6.7%)    |      |
| Moderate: z  [3,4)  | 2(2.2%)   | 2(2.6%)   | 0          |      |
| <b>FVC_Z_CAT</b>    |           |           |            | 0.67 |
| Normal:  z  <1.64   | 72(79.1%) | 59(77.6%) | 13(86.7%)  |      |
| Mild:  z  [1.64, 3) | 17(18.7%) | 15(19.7%) | 2(13.3%)   |      |
| Moderate: z  [3,4)  | 2(2.2%)   | 2(2.6%)   | 0          |      |
| <b>FEV1/FVC_Z</b>   |           |           |            | 0.49 |
| Normal:  z  <1.64   | 78(85.7%) | 66(86.8%) | 12(80.0%)  |      |
| Mild:  z  [1.64, 3) | 13(14.3%) | 10(13.2%) | 3(20.0%)   |      |
| <b>FEF2575_Z</b>    |           |           |            | 0.09 |
| Normal:  z  <1.64   | 74(81.3%) | 64(84.2%) | 10(66.7%)  |      |
| Mild:  z  [1.64, 3) | 14(15.4%) | 9(11.8%)  | 5(33.3%)   |      |
| Moderate: z  [3,4)  | 3(3.3%)   | 3(3.9%)   | 0          |      |

**Supplementary Table 3. Baseline PFT Data with Z Scores.**

DLCO = diffusing capacity for carbon dioxide (DLCO), TLC = total lung capacity, RV = residual volume, FEV1 = forced expiratory volume in one second, FVC = forced vital capacity, FRC = forced residual capacity, FEF25-75 = mid forced expiratory flow volumes between 25% and 75% of vital capacity

|                     | <b>All Patients</b> | <b>No ICU</b> | <b>ICU</b> | <b>P-value</b> |
|---------------------|---------------------|---------------|------------|----------------|
|                     | N=74                | N=64          | N=10       |                |
| <b>DLCO_Z</b>       |                     |               |            | <b>0.03</b>    |
| Normal:  z  <1.64   | 50(67.6%)           | 46(71.9%)     | 4(40.0%)   |                |
| Mild:  z  [1.64, 3) | 16(21.6%)           | 11(17.2%)     | 5(50.0%)   |                |
| Moderate: z  [3,4)  | 2(2.7%)             | 1(1.6%)       | 1(10.0%)   |                |
| Missing             | 6(8.1%)             | 6(9.4%)       | 0          |                |
| <b>TLC_Z</b>        |                     |               |            | 0.82           |
| Normal:  z  <1.64   | 60(81.1%)           | 52(81.3%)     | 8(80.0%)   |                |
| Mild:  z  [1.64, 3) | 6(8.1%)             | 5(7.8%)       | 1(10.0%)   |                |
| Missing             | 8(10.8%)            | 7(10.9%)      | 1(10.0%)   |                |
| <b>RV_Z</b>         |                     |               |            | 0.48           |
| Normal:  z  <1.64   | 63(85.1%)           | 54(84.4%)     | 9(90.0%)   |                |
| Mild:  z  [1.64, 3) | 3(4.1%)             | 3(4.7%)       | 0          |                |
| Missing             | 8(10.8%)            | 7(10.9%)      | 1(10.0%)   |                |
| <b>RVTLC_Z</b>      |                     |               |            | 0.27           |
| Normal:  z  <1.64   | 59(79.7%)           | 50(78.1%)     | 9(90.0%)   |                |
| Mild:  z  [1.64, 3) | 7(9.5%)             | 7(10.9%)      | 0          |                |
| Missing             | 8(10.8%)            | 7(10.9%)      | 1(10.0%)   |                |
| <b>FEV1_Z</b>       |                     |               |            | 0.33           |
| Normal:  z  <1.64   | 62(83.8%)           | 52(81.3%)     | 10(100.0%) |                |
| Mild:  z  [1.64, 3) | 11(14.9%)           | 11(17.2%)     | 0          |                |
| Moderate: z  [3,4)  | 1(1.4%)             | 1(1.6%)       | 0          |                |
| <b>FVC_Z</b>        |                     |               |            | 0.33           |
| Normal:  z  <1.64   | 62(83.8%)           | 52(81.3%)     | 10(100.0%) |                |
| Mild:  z  [1.64, 3) | 11(14.9%)           | 11(17.2%)     | 0          |                |
| Moderate: z  [3,4)  | 1(1.4%)             | 1(1.6%)       | 0          |                |
| <b>FEV1/FVC_Z</b>   |                     |               |            | 0.27           |

|                     |           |           |            |      |
|---------------------|-----------|-----------|------------|------|
| Normal:  z  <1.64   | 67(90.5%) | 57(89.1%) | 10(100.0%) |      |
| Mild:  z  [1.64, 3) | 7(9.5%)   | 7(10.9%)  | 0          |      |
| <b>FEF2575_Z</b>    |           |           |            | 0.05 |
| Normal:  z  <1.64   | 56(75.7%) | 46(71.9%) | 10(100.0%) |      |
| Mild:  z  [1.64, 3) | 18(24.3%) | 18(28.1%) | 0          |      |

**Supplementary Table 4. One-year Post-HCT PFT Data with Z Scores.**

DLCO = diffusing capacity for carbon dioxide (DLCO), TLC = total lung capacity, RV = residual volume, FEV1 = forced expiratory volume in one second, FVC = forced vital capacity, FRC = forced residual capacity, FEF25-75 = mid forced expiratory flow volumes between 25% and 75% of vital capacity
